# Supplementary material for: Dynamics of co-substrate pools can constrain and regulate metabolic fluxes
Source: eLife. 2023 Feb 17;12:e84379. doi: 10.7554/eLife.84379 (PMC10027320; doi:10.7554/eLife.84379)
Supplement: Supplementary file 1. [file elife-84379-supp1.xls]

## Sheet: enzyme_kinetics
*missing proteomics data - not used			ATP linked	NADH linked	NADPH linked
reaction_BiGG_ID	gene	cycling_pool	kcat_1_per_sec	compilation	literature for kcat	Km_uM	Km_metabolite
PFK	pfkA,pfkB	AMP + ADP + ATP	185	Davidi et al	PMID:7575542	13	C00085
PYK*	pykA,pykF	AMP + ADP + ATP		Wortel et al (Km from BRENDA by OSS)	PMID: 2200929	[25, 55, 480]	C00022
PGK	pgk	AMP + ADP + ATP	329	Davidi et al (Km from BRENDA by OSS)	PMID:4932978; doi: 10.1074/jbc.275.15.11147	480	C00197
DBTS	bioD1	AMP + ADP + ATP	0.00084	Davidi et al	PMID:4923070	[1.3, 0.3]	C01037
CYTK1	cmk	AMP + ADP + ATP	103	Davidi et al	PMID:17542990	35	C00055
PNTK	coaA	AMP + ADP + ATP	1.1	Davidi et al	PMID:19307712;15136582	[41, 9, 136, 36]	C00864
PTPATi	coaD	AMP + ADP + ATP	19	Davidi et al	PMID:8448160	4.7	C01134
ADSK	cysC	AMP + ADP + ATP	50	Davidi et al	PMID:2549047	[0.5, 0.25]	C00224
DHFS	folC	AMP + ADP + ATP	0.4	Davidi et al	PMID:2985605
GLYK	glpK	AMP + ADP + ATP	100	Davidi et al	PMID:5335908
GK1	gmk	AMP + ADP + ATP	74	Davidi et al	PMID:211389
UAMAS	murC	AMP + ADP + ATP	6.9	Davidi et al	PMID:8550531	[10, 34.3, 39, 44, 58, 300, 100]	C01050
UAMAGS	murD	AMP + ADP + ATP	6.7	Davidi et al	PMID:10493791	7.5	C01212
UAAGDS	murE	AMP + ADP + ATP	1.1	Davidi et al	PMID:11722566	76	C00692
UGMDDS	murF	AMP + ADP + ATP	11	Davidi et al	PMID:9166795	[11, 25]	C04877
PPK	ppk	AMP + ADP + ATP	11	Davidi et al	PMID:9012801
GLU5K	proB	AMP + ADP + ATP	53	Davidi et al	PMID:6319365
PRASCSi	purC	AMP + ADP + ATP	14	Davidi et al	PMID:1534690
PRAGSr	purD	AMP + ADP + ATP	15	Davidi et al	PMID:9843369	70	C03090
AIRC2	purK	AMP + ADP + ATP	130	Davidi et al	PMID:10572016	66	C03373
PRFGS	purL	AMP + ADP + ATP	5.1	Davidi et al	PMID:2659070
PRAIS	purM	AMP + ADP + ATP	4.1	Davidi et al	PMID:3530323;10508786	27	C04640
CTPS2	pyrG	AMP + ADP + ATP	14	Davidi et al	PMID:16427816	[27, 71]	C00075
PMPK	thiD	AMP + ADP + ATP	0.43	Davidi et al	DOI:10.1016/S0040-4020(98)01006-0
TMPK	thiL	AMP + ADP + ATP	0.12	Davidi et al	PMID:4567662	11	C01081
HSK	thrB	AMP + ADP + ATP	17	Davidi et al	PMID:17559838	150	C00263
DTMPK	tmk	AMP + ADP + ATP	9.6	Davidi et al	PMID:13967158	[240, 15]	C00364
ICDHyr	icd	NADP + NADPH	106	Davidi et al (Km from Wortel et al)	PMID:17401542	40.2	C00311
G6PDH2r	zwf	NADP + NADPH	174	Davidi et al (Km from Wortel et al)	PMID:22519976	174	C00092
GND	gnd	NADP + NADPH	55	Davidi et al	PMID:786365	93	C00345
3OAR140	fabG	NADP + NADPH	0.59	Davidi et al	PMID:6756317
UAPGR	murB	NADP + NADPH	20	Davidi et al	PMID:11284694
G5SD	proA	NADP + NADPH	10	Davidi et al	PMID:7035170	2200	C03287
P5CR	proC	NADP + NADPH	717	Davidi et al	PMID:6296787
MDH	mdh	NAD + NADH	1035	Davidi et al	DOI:10.1016/0167-4838(82)90198-4	2600	C00149
PDH	lpd,aceE,aceF	NAD + NADH	37.9	Wortel_etal	PMID: 17635929	260.9	C00022
AKGDH	lpd,sucA,sucB	NAD + NADH	149	Wortel_etal	PMID: 6380583	19.15	C00026
GAPD	gapA	NAD + NADH	268	Davidi et al	PMID:10190977	890	C00118
IMPD	guaB	NAD + NADH	16	Davidi et al	PMID:1103737;19480389	[13, 13.2, 11.1, 650]	C00130
HISTD	hisD	NAD + NADH	12	Davidi et al	PMID:329890
IPMD	leuB	NAD + NADH	69	Davidi et al	PMID:9003442;9086278
MTHFR2	metF	NAD + NADH	10	Davidi et al	PMID:11371182	85	C00143
NADK	ppnK	NAD + NADH and AMP + ADP + ATP	5.9	Davidi et al	PMID:19384989	[1850, 2000]	C00003
PGCD	serA	NAD + NADH	29	Davidi et al	PMID:8550422;17459882	1200	C00197
PPND	tyrA	NAD + NADH	71	Davidi et al	PMID:3298984	130	C00254

## Sheet: protein_abundance_mmol_per_gCDW
		ATP linked	NADH linked	NADPH linked
reaction_BiGG_ID	gene	acetate	fructose	galactose	glucose	glycerol	pyruvate	succinate
PFK	pfkA,pfkB	3.6e-06	6.8e-06	1e-05	5.1e-06	4.8e-06	3.3e-06	3.2e-06
PGK	pgk	0.00013	0.00016	8.9e-05	0.00014	0.00013	0.00011	0.00011
PYK	pykA,pykF
DBTS	bioD1	1.4e-06	7.2e-07	5.2e-07	1.6e-06	7.7e-07	8.4e-07	6.4e-07
CYTK1	cmk	2.3e-06	2.5e-06	1e-06	3.4e-06	2.8e-06	2.7e-06	2.6e-06
PNTK	coaA	6.3e-07	7.4e-07	3.2e-07	9.7e-07	9.4e-07	1.2e-06	1.1e-06
PTPATi	coaD	1.3e-07	1.9e-07		2.2e-07	2.2e-07	1.6e-07	2.4e-07
ADSK	cysC	2.1e-06	2e-06	1e-06	3e-06	2.1e-06	1.9e-06	1.8e-06
DHFS	folC	7.6e-07	9e-07	3.6e-07	1.3e-06	1.1e-06	9.5e-07	9.4e-07
GLYK	glpK
GK1	gmk	8.5e-07	1.3e-06	6.8e-07	1.5e-06	1.1e-06	9.3e-07	1.1e-06
UAMAS	murC	1.4e-06	1.4e-06	2.6e-07	1.5e-06	1.3e-06	1.6e-06	1.4e-06
UAMAGS	murD	3e-07	2.5e-07	6.9e-07	2.9e-07	2.6e-07	3.3e-07	2.4e-07
UAAGDS	murE	2.2e-06	1.5e-06	4.6e-07	1.8e-06	1.4e-06	2e-06	1.4e-06
UGMDDS	murF	2.2e-06	1.1e-06	2e-07	1.9e-06	1.8e-06	2e-06	1e-06
PPK	ppk
GLU5K	proB	1.9e-06	2.4e-06	2.3e-06	2.4e-06	2.1e-06	2.4e-06	2e-06
PRASCSi	purC	2.2e-05	2.5e-05	3.7e-05	2.9e-05	2.7e-05	3.5e-05	2.5e-05
PRAGSr	purD	3.5e-06	6.4e-06	2e-06	7.5e-06	5.8e-06	8.4e-06	5.2e-06
AIRC2	purK	4e-07	1.1e-06		8e-07	6.3e-07	8.5e-07	8.8e-07
PRFGS	purL	6.3e-06	8.2e-06	3.7e-06	8.7e-06	7.9e-06	1.1e-05	7.5e-06
PRAIS	purM	5.2e-06	8.1e-06	4.7e-06	9e-06	8.7e-06	1.1e-05	7.1e-06
CTPS2	pyrG	1.7e-06	3.1e-06	4.1e-06	3.4e-06	2.9e-06	2.5e-06	2.9e-06
PMPK	thiD			2.7e-06	9.9e-08	2.1e-07	1e-07	8.2e-08
TMPK	thiL	3.4e-07	1.8e-07	2.5e-07	3.6e-07	3.1e-07	3.3e-07	2.4e-07
HSK	thrB	1.7e-06	2.4e-06	2.8e-06	2.1e-06	1.7e-06	3.4e-06	1.6e-06
DTMPK	tmk	4e-07	2.6e-07		7.2e-07	4.2e-07	5e-07	2.7e-07
ICDHyr	icd	0.00013	8.1e-05	0.00017	0.00012	9.4e-05	0.00014	0.00011
G6PDH2r	zwf	2.7e-06	5.2e-06	6.2e-06	4.4e-06	4.5e-06	4e-06	3.4e-06
GND	gnd	2.4e-05	3.5e-05	3.7e-05	5e-05	3.2e-05	2.8e-05	3.1e-05
3OAR140	fabG	1.1e-05	1.3e-05	2.2e-05	1.7e-05	1.3e-05	1.3e-05	1.6e-05
UAPGR	murB	7.9e-08	1.2e-07		1.9e-07	1.4e-07	1.7e-07	9.4e-08
G5SD	proA	3e-06	3.6e-06	3.7e-06	3.3e-06	3.6e-06	3.2e-06	3.2e-06
P5CR	proC	2e-06	1.2e-06	4.9e-06	1.9e-06	1.7e-06	1.6e-06	1.6e-06
MDH	mdh	0.00052	0.00026	0.00035	0.00019	0.00025	0.00052	0.00028
GAPD	gapA	8.9e-05	0.00021	0.00015	0.00017	0.00012	8.5e-05	9.5e-05
PDH	lpd,aceE,aceF
AKGDH	lpd,sucA,sucB
IMPD	guaB	1.8e-05	2.6e-05	1.3e-05	4e-05	2.1e-05	1.8e-05	2.6e-05
HISTD	hisD	4.7e-06	6.7e-06	3.7e-06	1.2e-05	9.4e-06	7e-06	5.4e-06
IPMD	leuB	3.2e-05	1.7e-05	2.4e-05	1.6e-05	1.9e-05	1.2e-05	1.7e-05
MTHFR2	metF	9.8e-06	1.4e-05	5.2e-06	1.6e-05	1.3e-05	7.8e-06	9e-06
NADK	ppnK				6.7e-08
PGCD	serA	2e-05	2.6e-05	3.5e-05	4e-05	2.3e-05	2.5e-05	1.7e-05
PPND	tyrA	3.8e-06	6.1e-06	1.2e-06	5e-06	4.7e-06	9.1e-06	2.3e-06

## Sheet: flux_mmol_per_gCDW_h_gerosa
*missing proteomics data - not used		ATP linked	NADH linked	NADPH linked
reaction_BiGG_ID	reactants_BIGG_IDs	reactants_KEGG_IDs	products_BIGG_IDs	products_KEGG_IDs	acetate	fructose	galactose	glucose	glycerol	pyruvate	succinate		gluconate*
Ace_Ex					13.584 ¬± 0.326	-3.329 ¬± 0.059	0 ¬± 0	-6.827 ¬± 1.029	-0.597 ¬± 0.2	-11.914 ¬± 0.531	-3.321 ¬± 0.309		-5.004 ¬± 0.158
Fru_Ex					0 ¬± 0	8.328 ¬± 0.279	0 ¬± 0	0 ¬± 0	0 ¬± 0	0 ¬± 0	0 ¬± 0		0 ¬± 0
Gal_Ex					0 ¬± 0	0 ¬± 0	1.969 ¬± 0.013	0 ¬± 0	0 ¬± 0	0 ¬± 0	0 ¬± 0		0 ¬± 0
Glc_Ex					0 ¬± 0	0 ¬± 0	0 ¬± 0	9.654 ¬± 0.038	0 ¬± 0	0 ¬± 0	0 ¬± 0		0 ¬± 0
Gly_Ex					0 ¬± 0	0 ¬± 0	0 ¬± 0	0 ¬± 0	4.945 ¬± 0.146	0 ¬± 0	0 ¬± 0		0 ¬± 0
Gln_Ex					0 ¬± 0	0 ¬± 0	0 ¬± 0	0 ¬± 0	0 ¬± 0	0 ¬± 0	0 ¬± 0		7.284 ¬± 0.034
Pyr_Ex					0 ¬± 0	0 ¬± 0	0 ¬± 0	0 ¬± 0	0 ¬± 0	26.714 ¬± 0.798	0 ¬± 0		0 ¬± 0
Suc_Ex					0 ¬± 0	0 ¬± 0	0 ¬± 0	0 ¬± 0	0 ¬± 0	0 ¬± 0	15.902 ¬± 0.306		0 ¬± 0
Fum_Ex					0 ¬± 0	0 ¬± 0	0 ¬± 0	0 ¬± 0	0 ¬± 0	0 ¬± 0	1.14 ¬± 0.069		0 ¬± 0
Lac_Ex					0 ¬± 0	0 ¬± 0	0 ¬± 0	0 ¬± 0	0 ¬± 0	1.157 ¬± 0.069	0 ¬± 0		0 ¬± 0
PGI	g6p	C00092	f6p	C05345	-3.423 ¬± 0.567	-6.198 ¬± 0.373	1.368 ¬± 0.04	5.7 ¬± 0.311	-3.449 ¬± 0.162	-0.898 ¬± 0.067	-5.59 ¬± 0.544		-0.031 ¬± 0
FBP	fdp; h20	C00354; C00001	f6p; pi	C00085; C00009	1.886 ¬± 0.301	-2.461 ¬± 0.124	0 ¬± 0	0 ¬± 0	1.5 ¬± 0.083	0.587 ¬± 0.022	2.692 ¬± 0.3		0 ¬± 0
PFK	f6p; atp	C00085; C00002	fdp; adp; h	C00354; C00008; C00080	0 ¬± 0	0 ¬± 0	1.547 ¬± 0.014	7.058 ¬± 0.142	0 ¬± 0	0 ¬± 0	0 ¬± 0		0.487 ¬± 0.033
FBA	fdp	C00354	dhap; g3p	C00111; C00118	-1.886 ¬± 0.118	5.867 ¬± 0.046	1.547 ¬± 0.006	7.058 ¬± 0.052	-1.496 ¬± 0.041	-0.587 ¬± 0.009	-2.692 ¬± 0.114		0.487 ¬± 0.016
TPI	dhap	C00111	g3p	C00118	-1.886 ¬± 0.301	5.867 ¬± 0.124	1.547 ¬± 0.014	7.058 ¬± 0.142	8.64 ¬± 0.083	-0.587 ¬± 0.022	-2.692 ¬± 0.3		0.487 ¬± 0.033
PGK	3pg; atp	C00197; C00002	13dpg; adp	C00236; C00008	-2.264 ¬± 0.301	13.465 ¬± 0.124	3.309 ¬± 0.014	15.71 ¬± 0.142	8.013 ¬± 0.083	-1.129 ¬± 0.022	-3.415 ¬± 0.3		6.895 ¬± 0.033
GAPD	g3p; nad; pi	C00118; C00003; C00009	13dpg; nadh; h	C00236; C00004; C00080	-2.264 ¬± 0.301	13.465 ¬± 0.124	3.309 ¬± 0.014	15.71 ¬± 0.142	8.013 ¬± 0.083	-1.129 ¬± 0.022	-3.415 ¬± 0.3		6.895 ¬± 0.033
PGM	2pg	C00631	3pg	C00197	-2.737 ¬± 0.301	12.599 ¬± 0.124	3.042 ¬± 0.014	14.558 ¬± 0.142	7.259 ¬± 0.083	-1.789 ¬± 0.022	-4.274 ¬± 0.3		5.873 ¬± 0.033
ENO	2pg	C00631	h2o; pep	C00001; C00074	-2.737 ¬± 0.301	12.599 ¬± 0.124	3.042 ¬± 0.014	14.558 ¬± 0.142	7.259 ¬± 0.083	-1.789 ¬± 0.022	-4.274 ¬± 0.3		5.873 ¬± 0.033
PYK*	pep; adp; h	C00074; C00008; C00080	pyr; atp	C00022; C00002	0 ¬± 0	0.669 ¬± 0.469	3.357 ¬± 0.032	2.487 ¬± 0.142	5.507 ¬± 0.083	0 ¬± 0	0 ¬± 0		3.465 ¬± 0.033
PPS*	pyr; atp; h2o	C00022; C00002; C00001	pep; amp; h; pi	C00074; C00020; C00080; C00009	1.653 ¬± 1.311	0 ¬± 0	0 ¬± 0	0 ¬± 0	0 ¬± 0	3.45 ¬± 0.247	3.73 ¬± 3.518		0 ¬± 0
PDH*	pyr; nad; coa;	C00022; C00003; C00010	accoa; co2; nadh	C00024; C00011; C00004	0.065 ¬± 0.166	9.069 ¬± 0.122	2.943 ¬± 0.033	11.298 ¬± 0.091	4.098 ¬± 0.052	21.017 ¬± 0.11	7.752 ¬± 0.041		7.506 ¬± 0.016
EDD	6pgc	C00345	2ddg6p; h2o	C04442; C00001	0.822 ¬± 0.205	0 ¬± 0	0.173 ¬± 0.015	1.087 ¬± 0.08	0.015 ¬± 0	0 ¬± 0	0.655 ¬± 0.244		5.819 ¬± 0.049
EDA	2ddg6p	C04442	g3p; pyr	C00118; C00022	0.822 ¬± 0.205	0 ¬± 0	0.173 ¬± 0.015	1.087 ¬± 0.08	0.015 ¬± 0	0 ¬± 0	0.655 ¬± 0.244		5.819 ¬± 0.049
G6PDH2r	g6p; nadp	C00092; C00006	6pgl; nadph; h	C01236; C00005; C00080	3.408 ¬± 0.493	6.171 ¬± 0.373	0.592 ¬± 0.05	3.919 ¬± 0.283	3.426 ¬± 0.072	0.877 ¬± 0.067	5.563 ¬± 0.529		0 ¬± 0.07
PGL	6pgl; h2o	C01236; C00001	6pgc; h	C00345; C00080	3.408 ¬± 0.493	6.171 ¬± 0.373	0.592 ¬± 0.05	3.919 ¬± 0.283	3.426 ¬± 0.072	0.877 ¬± 0.067	5.563 ¬± 0.529		0 ¬± 0.07
GND	6pgc; nadp	C00345; C00006	ru5p_D; nadph; co2	C00199; C00005; C00011	2.587 ¬± 0.448	6.171 ¬± 0.373	0.419 ¬± 0.047	2.832 ¬± 0.272	3.412 ¬± 0.155	0.877 ¬± 0.067	4.908 ¬± 0.469		1.465 ¬± 0.049
RPI	r5p	C03736	ru5p_D	C00199	1.029 ¬± 0.149	2.399 ¬± 0.124	0.228 ¬± 0.016	1.427 ¬± 0.091	1.426 ¬± 0.052	0.539 ¬± 0.022	1.974 ¬± 0.156		0.905 ¬± 0.016
RPE	ru5p_D	C00199	xu5p_D	C00231	1.557 ¬± 0.149	3.773 ¬± 0.124	0.191 ¬± 0.016	1.405 ¬± 0.091	1.985 ¬± 0.052	0.338 ¬± 0.022	2.934 ¬± 0.156		0.56 ¬± 0.016
TKT1	r5p; xu5p_D	C03736; C00231	g3p; s7p	C00118; C05382	0.839 ¬± 0.149	1.984 ¬± 0.124	0.132 ¬± 0.016	0.82 ¬± 0.091	1.081 ¬± 0.052	0.248 ¬± 0.022	1.564 ¬± 0.156		0.389 ¬± 0.016
TALA	g3p; s7p	C00118; C05382	e4p; f6p	C00279; C00085	0.839 ¬± 0.149	1.984 ¬± 0.124	0.132 ¬± 0.016	0.82 ¬± 0.091	1.081 ¬± 0.052	0.248 ¬± 0.022	1.564 ¬± 0.156		0.389 ¬± 0.016
TKT2	e4p; xu5p_D	C00279; C00231	f6p; g3p	C00085; C00118	0.718 ¬± 0.149	1.789 ¬± 0.124	0.059 ¬± 0.016	0.585 ¬± 0.091	0.904 ¬± 0.052	0.09 ¬± 0.022	1.37 ¬± 0.156		0.171 ¬± 0.016
PPC	pep; co2; h2o	C00074; C00011; C00001	oaa; h; pi	C00036; C00080; C00009	1.774 ¬± 0.354	3.546 ¬± 0.116	0.377 ¬± 0.021	2.453 ¬± 0.121	1.376 ¬± 0	2.489 ¬± 0.128	2.016 ¬± 0.053		1.943 ¬± 0
PPCK*	oaa; atp	C00036; C00002	pep; adp; co2	C00074; C00008; C00011	3.114 ¬± 1.209	0.359 ¬± 0.459	0.849 ¬± 0.033	0.541 ¬± 0.121	0 ¬± 0	1.165 ¬± 0.274	2.972 ¬± 3.487		0 ¬± 0
CS	accoa; oaa; h2o	C00024; C00036; C00001	cit; coa; h	C00158; C00010; C00080	8.834 ¬± 0.149	4.568 ¬± 0.124	1.521 ¬± 0.016	2.978 ¬± 0.091	2.465 ¬± 0.052	8.082 ¬± 0.022	3.155 ¬± 0.156		1.154 ¬± 0.016
ACONT	cit	C00158	icit	C00311	8.834 ¬± 0.149	4.568 ¬± 0.124	1.521 ¬± 0.016	2.978 ¬± 0.091	2.465 ¬± 0.052	8.082 ¬± 0.022	3.155 ¬± 0.156		1.154 ¬± 0.016
ACONT2					8.834 ¬± 0.149	4.568 ¬± 0.124	1.521 ¬± 0.016	2.978 ¬± 0.091	2.465 ¬± 0.052	8.082 ¬± 0.022	3.155 ¬± 0.156		1.154 ¬± 0.016
ICDHyr	icit; nadp	C00311; C00006	akg; nadph; co2	C00026; C00005; C00011	4.696 ¬± 0.337	4.566 ¬± 0.128	0.496 ¬± 0.035	2.978 ¬± 0.091	2.465 ¬± 0.052	7.979 ¬± 0.102	3.039 ¬± 0.301		1.154 ¬± 0.016
SUCOAS*	succ; coa; atp	C00042; C00010; C00002	succoa; adp; pi	C00091; C00008; C00009	4.267 ¬± 0.337	3.875 ¬± 0.128	0.236 ¬± 0.035	2.138 ¬± 0.091	1.84 ¬± 0.052	7.416 ¬± 0.102	2.352 ¬± 0.301		0.182 ¬± 0.016
AKGDH*	akg; coa; nad	C00026; C00010; C00003	succoa; nadh; co2	C00091; C00004; C00011	4.267 ¬± 0.337	3.875 ¬± 0.128	0.236 ¬± 0.035	2.138 ¬± 0.091	1.84 ¬± 0.052	7.416 ¬± 0.102	2.352 ¬± 0.301		0.182 ¬± 0.016
SUCDH3					8.405 ¬± 0.149	3.877 ¬± 0.124	1.261 ¬± 0.016	2.138 ¬± 0.091	1.84 ¬± 0.052	7.518 ¬± 0.022	18.37 ¬± 0.156		0.182 ¬± 0.016
FUM	fum; h2o	C00122; C00001	mal_L	C00149	8.405 ¬± 0.149	3.877 ¬± 0.124	1.261 ¬± 0.016	2.138 ¬± 0.091	1.84 ¬± 0.052	7.518 ¬± 0.022	17.23 ¬± 0.156		0.182 ¬± 0.016
MDH	mal_L; nad	C00149; C00003	oaa; nadh; h	C00036; C00004; C00080	10.671 ¬± 1.202	2.228 ¬± 0.469	2.285 ¬± 0.033	2.138 ¬± 0.091	1.84 ¬± 0.052	7.428 ¬± 0.247	4.951 ¬± 3.475		0.182 ¬± 0.016
ME1*	mal_L; nad	C00149; C00003	pyr; nadh; co2	C00022; C00004; C00011	1.871 ¬± 1.186	1.652 ¬± 0.462	0.001 ¬± 0.003	0 ¬± 0	0 ¬± 0	0.193 ¬± 0.25	12.396 ¬± 3.473		0 ¬± 0
ICL	icit	C00311	succ; glx	C00042; C00048	4.138 ¬± 0.22	0.002 ¬± 0.013	1.025 ¬± 0.03	0 ¬± 0	0 ¬± 0	0.103 ¬± 0.104	0.116 ¬± 0.148		0 ¬± 0
MALS	accoa; glx; h2o	C00024; C00048; C00001	mal_L; coa; h	C00149; C00010; C00080	4.138 ¬± 0.22	0.002 ¬± 0.013	1.025 ¬± 0.03	0 ¬± 0	0 ¬± 0	0.103 ¬± 0.104	0.116 ¬± 0.148		0 ¬± 0
Growth_rate					0.29 ¬± 0.013	0.492 ¬± 0.01	0.18 ¬± 0.01	0.65 ¬± 0.01	0.49 ¬± 0.008	0.39 ¬± 0.01	0.51 ¬± 0.01		0.59 ¬± 0.025

## Sheet: flux_mmol_per_gCDW_s_davidi
*missing proteomics data - not used			ATP linked	NADH linked	NADPH linked
reaction_BiGG_ID	acetate	fructose	galactose	glucose	glycerol	pyruvate	succinate		fumarate*	glucosamine*	mannose*	xylose*
3OAR140	6.5e-06	1.4e-05	5.6e-06	1.3e-05	1e-05	8.6e-06	9.5e-06		9.1e-06	9.9e-06	1e-05	1.2e-05
5DOAN	1.9e-08	4.1e-08	1.6e-08	3.6e-08	2.9e-08	2.5e-08	2.8e-08		2.6e-08	2.9e-08	2.9e-08	3.4e-08
ACGK	2.5e-05	5.3e-05	2.1e-05	4.8e-05	3.9e-05	3.3e-05	3.6e-05		3.5e-05	3.8e-05	3.9e-05	4.5e-05
ACGS	2.5e-05	5.3e-05	2.1e-05	4.8e-05	3.9e-05	3.3e-05	3.6e-05		3.5e-05	3.8e-05	3.9e-05	4.5e-05
ACOAD1f_reverse	3e-05	6.4e-05	2.6e-05	5.7e-05	4.6e-05	4e-05	4.3e-05		4.2e-05	4.5e-05	4.6e-05	5.4e-05
ACOAD2f_reverse	3e-05	6.4e-05	2.6e-05	5.7e-05	4.6e-05	4e-05	4.3e-05		4.2e-05	4.5e-05	4.6e-05	5.4e-05
ACOAD3f_reverse	3e-05	6.4e-05	2.6e-05	5.7e-05	4.6e-05	4e-05	4.3e-05		4.2e-05	4.5e-05	4.6e-05	5.4e-05
ACOAD4f_reverse	3e-05	6.4e-05	2.6e-05	5.7e-05	4.6e-05	4e-05	4.3e-05		4.2e-05	4.5e-05	4.6e-05	5.4e-05
ACOAD5f_reverse	3e-05	6.4e-05	2.6e-05	5.7e-05	4.6e-05	4e-05	4.3e-05		4.2e-05	4.5e-05	4.6e-05	5.4e-05
ACOAD6f_reverse	2.3e-05	5e-05	2e-05	4.5e-05	3.6e-05	3.1e-05	3.4e-05		3.2e-05	3.6e-05	3.6e-05	4.2e-05
ACOAD7f_reverse	1.1e-05	2.3e-05	9.2e-06	2.1e-05	1.7e-05	1.4e-05	1.6e-05		1.5e-05	1.6e-05	1.7e-05	1.9e-05
ACODA	2.5e-05	5.3e-05	2.1e-05	4.8e-05	3.9e-05	3.3e-05	3.6e-05		3.5e-05	3.8e-05	3.9e-05	4.5e-05
ADCL	5.6e-08	1.2e-07	4.8e-08	1.1e-07	8.7e-08	7.4e-08	8.2e-08		7.8e-08	8.5e-08	8.7e-08	1e-07
ADK1	0.00022	0.00047	0.00019	0.00042	0.00034	0.00029	0.00032		0.00031	0.00034	0.00034	0.0004
ADNK1	5.6e-08	1.2e-07	4.9e-08	1.1e-07	8.8e-08	7.5e-08	8.2e-08		7.9e-08	8.6e-08	8.8e-08	1e-07
ADSK	2.1e-05	4.5e-05	1.8e-05	4e-05	3.2e-05	2.8e-05	3e-05		2.9e-05	3.2e-05	3.2e-05	3.8e-05
ADSL1r	2.5e-05	5.4e-05	2.2e-05	4.8e-05	3.9e-05	3.3e-05	3.7e-05		3.5e-05	3.8e-05	3.9e-05	4.6e-05
ADSL2r	3.7e-05	8.1e-05	3.2e-05	7.2e-05	5.8e-05	5e-05	5.5e-05		5.2e-05	5.7e-05	5.8e-05	6.8e-05
ADSS	2.5e-05	5.4e-05	2.2e-05	4.8e-05	3.9e-05	3.3e-05	3.7e-05		3.5e-05	3.8e-05	3.9e-05	4.6e-05
AGPAT160	5.3e-06	1.2e-05	4.6e-06	1e-05	8.3e-06	7.1e-06	7.8e-06		7.4e-06	8.2e-06	8.3e-06	9.7e-06
AGPAT161	6.3e-06	1.4e-05	5.4e-06	1.2e-05	9.8e-06	8.4e-06	9.2e-06		8.8e-06	9.6e-06	9.8e-06	1.1e-05
AGPR_reverse	2.5e-05	5.3e-05	2.1e-05	4.8e-05	3.9e-05	3.3e-05	3.6e-05		3.5e-05	3.8e-05	3.9e-05	4.5e-05
AHCYSNS	3.7e-08	8.1e-08	3.2e-08	7.2e-08	5.8e-08	5e-08	5.5e-08		5.2e-08	5.7e-08	5.8e-08	6.8e-08
AICART	4.5e-05	9.8e-05	3.9e-05	8.7e-05	7.1e-05	6e-05	6.6e-05		6.3e-05	6.9e-05	7.1e-05	8.3e-05
AIRC2	3.7e-05	8.1e-05	3.2e-05	7.2e-05	5.8e-05	5e-05	5.5e-05		5.2e-05	5.7e-05	5.8e-05	6.8e-05
AIRC3_reverse	3.7e-05	8.1e-05	3.2e-05	7.2e-05	5.8e-05	5e-05	5.5e-05		5.2e-05	5.7e-05	5.8e-05	6.8e-05
AMAOTr	1.7e-10	3.6e-10	1.4e-10	3.2e-10	2.6e-10	2.2e-10	2.4e-10		2.3e-10	2.6e-10	2.6e-10	3.1e-10
AMPMS2	1.9e-08	4e-08	1.6e-08	3.6e-08	2.9e-08	2.5e-08	2.7e-08		2.6e-08	2.8e-08	2.9e-08	3.4e-08
ANPRT	4.7e-06	1e-05	4.1e-06	9.2e-06	7.4e-06	6.3e-06	6.9e-06		6.6e-06	7.3e-06	7.4e-06	8.7e-06
AOXSr2	1.7e-10	3.6e-10	1.4e-10	3.2e-10	2.6e-10	2.2e-10	2.4e-10		2.3e-10	2.6e-10	2.6e-10	3.1e-10
APRAUR	3.7e-08	8.1e-08	3.2e-08	7.2e-08	5.8e-08	5e-08	5.5e-08		5.2e-08	5.7e-08	5.8e-08	6.8e-08
ARGSL	2.5e-05	5.3e-05	2.1e-05	4.8e-05	3.9e-05	3.3e-05	3.6e-05		3.5e-05	3.8e-05	3.9e-05	4.5e-05
ARGSS	2.5e-05	5.3e-05	2.1e-05	4.8e-05	3.9e-05	3.3e-05	3.6e-05		3.5e-05	3.8e-05	3.9e-05	4.5e-05
ASAD_reverse	8.9e-05	0.00019	7.7e-05	0.00017	0.00014	0.00012	0.00013		0.00012	0.00014	0.00014	0.00016
ASNS2	2e-05	4.4e-05	1.7e-05	3.9e-05	3.1e-05	2.7e-05	2.9e-05		2.8e-05	3.1e-05	3.1e-05	3.7e-05
ASP1DC	4.8e-08	1e-07	4.2e-08	9.3e-08	7.5e-08	6.4e-08	7e-08		6.7e-08	7.4e-08	7.5e-08	8.8e-08
ASPO6	1.9e-07	4.1e-07	1.6e-07	3.7e-07	3e-07	2.5e-07	2.8e-07		2.7e-07	2.9e-07	3e-07	3.5e-07
ASPTA_reverse	0.00024	0.00053	0.00021	0.00047	0.00038	0.00033	0.00036		0.00034	0.00037	0.00038	0.00045
ATPPRT	7.9e-06	1.7e-05	6.8e-06	1.5e-05	1.2e-05	1.1e-05	1.2e-05		1.1e-05	1.2e-05	1.2e-05	1.4e-05
BMOCOS	1e-08	2.2e-08	8.8e-09	2e-08	1.6e-08	1.4e-08	1.5e-08		1.4e-08	1.6e-08	1.6e-08	1.9e-08
BPNT	2.1e-05	4.5e-05	1.8e-05	4e-05	3.2e-05	2.8e-05	3e-05		2.9e-05	3.2e-05	3.2e-05	3.8e-05
BTS5	1.7e-10	3.6e-10	1.4e-10	3.2e-10	2.6e-10	2.2e-10	2.4e-10		2.3e-10	2.6e-10	2.6e-10	3.1e-10
CDPMEK	2e-07	4.3e-07	1.7e-07	3.8e-07	3.1e-07	2.7e-07	2.9e-07		2.8e-07	3.1e-07	3.1e-07	3.6e-07
CHORS	3.2e-05	6.9e-05	2.8e-05	6.1e-05	5e-05	4.2e-05	4.7e-05		4.4e-05	4.9e-05	5e-05	5.8e-05
CHRPL	1.9e-08	4e-08	1.6e-08	3.6e-08	2.9e-08	2.5e-08	2.7e-08		2.6e-08	2.8e-08	2.9e-08	3.4e-08
CPPPGO	1.9e-08	4e-08	1.6e-08	3.6e-08	2.9e-08	2.5e-08	2.7e-08		2.6e-08	2.8e-08	2.9e-08	3.4e-08
CS	0.00045	0.00086	0.0004	0.00078	0.00045	0.00082	0.00062		0.00019	0.00064	0.00065	0.00075
CTECOAI7_reverse	1.3e-05	2.7e-05	1.1e-05	2.4e-05	2e-05	1.7e-05	1.8e-05		1.8e-05	1.9e-05	2e-05	2.3e-05
CTPS2	1.3e-05	2.9e-05	1.2e-05	2.6e-05	2.1e-05	1.8e-05	2e-05		1.9e-05	2.1e-05	2.1e-05	2.5e-05
CYTK1	1.5e-05	3.3e-05	1.3e-05	2.9e-05	2.4e-05	2e-05	2.2e-05		2.1e-05	2.3e-05	2.4e-05	2.8e-05
DALAt2pp	1.2e-06	2.5e-06	1e-06	2.2e-06	1.8e-06	1.5e-06	1.7e-06		1.6e-06	1.8e-06	1.8e-06	2.1e-06
DAPDC	2.9e-05	6.2e-05	2.5e-05	5.5e-05	4.5e-05	3.8e-05	4.2e-05		4e-05	4.4e-05	4.5e-05	5.2e-05
DAPE	3.1e-05	6.7e-05	2.7e-05	6e-05	4.8e-05	4.1e-05	4.5e-05		4.3e-05	4.7e-05	4.8e-05	5.7e-05
DASYN160	5.3e-06	1.2e-05	4.6e-06	1e-05	8.3e-06	7.1e-06	7.8e-06		7.4e-06	8.2e-06	8.3e-06	9.7e-06
DASYN161	6.3e-06	1.4e-05	5.4e-06	1.2e-05	9.8e-06	8.4e-06	9.2e-06		8.8e-06	9.6e-06	9.8e-06	1.1e-05
DB4PS	7.4e-08	1.6e-07	6.4e-08	1.4e-07	1.2e-07	9.9e-08	1.1e-07		1e-07	1.1e-07	1.2e-07	1.4e-07
DBTS	1.7e-10	3.6e-10	1.4e-10	3.2e-10	2.6e-10	2.2e-10	2.4e-10		2.3e-10	2.6e-10	2.6e-10	3.1e-10
DHAD1	7.3e-05	0.00016	6.3e-05	0.00014	0.00011	9.7e-05	0.00011		0.0001	0.00011	0.00011	0.00013
DHAD2	2.4e-05	5.2e-05	2.1e-05	4.7e-05	3.8e-05	3.2e-05	3.6e-05		3.4e-05	3.7e-05	3.8e-05	4.4e-05
DHDPRy	3.1e-05	6.7e-05	2.7e-05	6e-05	4.8e-05	4.1e-05	4.5e-05		4.3e-05	4.7e-05	4.8e-05	5.7e-05
DHDPS	3.1e-05	6.7e-05	2.7e-05	6e-05	4.8e-05	4.1e-05	4.5e-05		4.3e-05	4.7e-05	4.8e-05	5.7e-05
DHFS	5.6e-08	1.2e-07	4.8e-08	1.1e-07	8.7e-08	7.4e-08	8.2e-08		7.8e-08	8.5e-08	8.7e-08	1e-07
DHNPA2r	5.6e-08	1.2e-07	4.8e-08	1.1e-07	8.7e-08	7.4e-08	8.2e-08		7.8e-08	8.5e-08	8.7e-08	1e-07
DHORD2	2.8e-05	6e-05	2.4e-05	5.3e-05	4.3e-05	3.7e-05	4e-05		3.9e-05	4.2e-05	4.3e-05	5.1e-05
DHORTS_reverse	2.8e-05	6e-05	2.4e-05	5.3e-05	4.3e-05	3.7e-05	4e-05		3.9e-05	4.2e-05	4.3e-05	5.1e-05
DHPPDA2	3.7e-08	8.1e-08	3.2e-08	7.2e-08	5.8e-08	5e-08	5.5e-08		5.2e-08	5.7e-08	5.8e-08	6.8e-08
DHPS2	5.6e-08	1.2e-07	4.8e-08	1.1e-07	8.7e-08	7.4e-08	8.2e-08		7.8e-08	8.5e-08	8.7e-08	1e-07
DHQS	3.2e-05	6.9e-05	2.8e-05	6.1e-05	5e-05	4.2e-05	4.7e-05		4.4e-05	4.9e-05	5e-05	5.8e-05
DHQTi	3.2e-05	6.9e-05	2.8e-05	6.1e-05	5e-05	4.2e-05	4.7e-05		4.4e-05	4.9e-05	5e-05	5.8e-05
DMATT	2.3e-08	5e-08	2e-08	4.5e-08	3.6e-08	3.1e-08	3.4e-08		3.2e-08	3.6e-08	3.6e-08	4.2e-08
DMPPS	2.3e-08	5e-08	2e-08	4.5e-08	3.6e-08	3.1e-08	3.4e-08		3.2e-08	3.6e-08	3.6e-08	4.2e-08
DPCOAK	4.8e-08	1e-07	4.2e-08	9.3e-08	7.5e-08	6.4e-08	7e-08		6.7e-08	7.4e-08	7.5e-08	8.8e-08
DTMPK	2.2e-06	4.7e-06	1.9e-06	4.2e-06	3.4e-06	2.9e-06	3.2e-06		3.1e-06	3.3e-06	3.4e-06	4e-06
DXPRIi	2e-07	4.3e-07	1.7e-07	3.8e-07	3.1e-07	2.7e-07	2.9e-07		2.8e-07	3.1e-07	3.1e-07	3.6e-07
DXPS	2.4e-07	5.1e-07	2e-07	4.6e-07	3.7e-07	3.1e-07	3.5e-07		3.3e-07	3.6e-07	3.7e-07	4.3e-07
EGMEACPR	1.7e-10	3.6e-10	1.4e-10	3.2e-10	2.6e-10	2.2e-10	2.4e-10		2.3e-10	2.6e-10	2.6e-10	3.1e-10
ENO	0.0013	0.0028	0.0012	0.0025	0.0018	0.00089	0.0013		0.0014	0.002	0.002	0.0023
EPMEACPR	1.7e-10	3.6e-10	1.4e-10	3.2e-10	2.6e-10	2.2e-10	2.4e-10		2.3e-10	2.6e-10	2.6e-10	3.1e-10
FACOAE120	6.5e-06	1.4e-05	5.6e-06	1.3e-05	1e-05	8.6e-06	9.5e-06		9.1e-06	9.9e-06	1e-05	1.2e-05
FACOAE160	1.1e-05	2.3e-05	9.2e-06	2.1e-05	1.7e-05	1.4e-05	1.6e-05		1.5e-05	1.6e-05	1.7e-05	1.9e-05
FACOAE161	1.3e-05	2.7e-05	1.1e-05	2.4e-05	2e-05	1.7e-05	1.8e-05		1.8e-05	1.9e-05	2e-05	2.3e-05
FADRx	0.00018	0.00039	0.00016	0.00035	0.00029	0.00024	0.00027		0.00026	0.00028	0.00029	0.00033
FBA3	9.3e-05	0.00022	7.9e-05	0.00019		0.00013	0.0001		7.2e-05	0.00015	0.00015	0.00018
FMNAT	1.9e-08	4e-08	1.6e-08	3.6e-08	2.9e-08	2.5e-08	2.7e-08		2.6e-08	2.8e-08	2.9e-08	3.4e-08
G1PACT	7.9e-06	1.7e-05	6.8e-06	1.5e-05	1.2e-05	1e-05	1.2e-05		1.1e-05	1.2e-05	1.2e-05	1.4e-05
G1SAT	3e-07	6.4e-07	2.6e-07	5.7e-07	4.7e-07	4e-07	4.4e-07		4.2e-07	4.6e-07	4.7e-07	5.5e-07
G3PD2_reverse	1.2e-05	2.5e-05	1e-05	2.2e-05		1.5e-05	1.7e-05		1.6e-05	1.8e-05	1.8e-05	2.1e-05
G5SD	1.8e-05	4e-05	1.6e-05	3.6e-05	2.9e-05	2.5e-05	2.7e-05		2.6e-05	2.8e-05	2.9e-05	3.4e-05
G6PDH2r	0.00033	0.00076	0.00028	0.00068	0.00017	0.00047	0.00038		0.00029	0.00053	0.00054	0.00064
GAPD	0.0015	0.0031	0.0013	0.0027	0.002	0.0011	0.0015		0.0016	0.0022	0.0022	0.0026
GARFT	3.7e-05	8e-05	3.2e-05	7.2e-05	5.9e-05	5e-05	5.4e-05		5.2e-05	5.7e-05	5.8e-05	6.8e-05
GART	2e-07	4.4e-07	1.8e-07	4e-07		2.7e-07	3e-07		2.9e-07	3.1e-07	3.2e-07	3.7e-07
GCALDD	5.6e-08	1.2e-07	4.8e-08	1.1e-07	8.7e-08	7.4e-08	8.2e-08		7.8e-08	8.5e-08	8.7e-08	1e-07
GF6PTA	7.9e-06	1.7e-05	6.8e-06	1.5e-05	1.2e-05	1e-05	1.2e-05		1.1e-05	1.2e-05	1.2e-05	1.4e-05
GHMT2r	9.3e-05	0.0002	8.1e-05	0.00018	0.00015	0.00012	0.00014		0.00013	0.00014	0.00015	0.00017
GK1	2e-05	4.4e-05	1.8e-05	3.9e-05	3.2e-05	2.7e-05	3e-05		2.8e-05	3.1e-05	3.2e-05	3.7e-05
GLU5K	1.8e-05	4e-05	1.6e-05	3.6e-05	2.9e-05	2.5e-05	2.7e-05		2.6e-05	2.8e-05	2.9e-05	3.4e-05
GLUDy_reverse	0.00071	0.0015	0.00062	0.0014	0.0011	0.00095	0.001		0.001	0.0011	0.0011	0.0013
GLUPRT	3.7e-05	8.1e-05	3.2e-05	7.2e-05	5.9e-05	5e-05	5.5e-05		5.2e-05	5.7e-05	5.9e-05	6.8e-05
GLUR_reverse	2.3e-06	5e-06	2e-06	4.5e-06	3.6e-06	3.1e-06	3.4e-06		3.2e-06	3.6e-06	3.6e-06	4.2e-06
GLUTRS	3e-07	6.4e-07	2.6e-07	5.7e-07	4.7e-07	4e-07	4.4e-07		4.2e-07	4.6e-07	4.7e-07	5.5e-07
GMPS2	2e-05	4.4e-05	1.8e-05	3.9e-05	3.2e-05	2.7e-05	3e-05		2.8e-05	3.1e-05	3.2e-05	3.7e-05
GND	0.00033	0.00076	0.00028	0.00068	0.00017	0.00047	0.00038		0.00029	0.00053	0.00054	0.00064
GRTT	2.3e-08	5e-08	2e-08	4.5e-08	3.6e-08	3.1e-08	3.4e-08		3.2e-08	3.6e-08	3.6e-08	4.2e-08
GTPCI	5.6e-08	1.2e-07	4.8e-08	1.1e-07	8.7e-08	7.4e-08	8.2e-08		7.8e-08	8.5e-08	8.7e-08	1e-07
GTPCII2	3.7e-08	8.1e-08	3.2e-08	7.2e-08	5.8e-08	5e-08	5.5e-08		5.2e-08	5.7e-08	5.8e-08	6.8e-08
HCO3E	4.4e-05	9.5e-05	3.8e-05	8.5e-05	6.9e-05	5.8e-05	6.4e-05		6.1e-05	6.7e-05	6.9e-05	8e-05
HISTD	7.9e-06	1.7e-05	6.8e-06	1.5e-05	1.2e-05	1.1e-05	1.2e-05		1.1e-05	1.2e-05	1.2e-05	1.4e-05
HISTP	7.9e-06	1.7e-05	6.8e-06	1.5e-05	1.2e-05	1.1e-05	1.2e-05		1.1e-05	1.2e-05	1.2e-05	1.4e-05
HMBS	3.7e-08	8.1e-08	3.2e-08	7.2e-08	5.8e-08	5e-08	5.5e-08		5.2e-08	5.7e-08	5.8e-08	6.8e-08
HPPK2	5.6e-08	1.2e-07	4.8e-08	1.1e-07	8.7e-08	7.4e-08	8.2e-08		7.8e-08	8.5e-08	8.7e-08	1e-07
HSK	4.5e-05	9.8e-05	3.9e-05	8.8e-05	7.1e-05	6e-05	6.7e-05		6.3e-05	7e-05	7.1e-05	8.3e-05
HSST	1.3e-05	2.8e-05	1.1e-05	2.5e-05	2e-05	1.7e-05	1.9e-05		1.8e-05	2e-05	2e-05	2.4e-05
HSTPT	7.9e-06	1.7e-05	6.8e-06	1.5e-05	1.2e-05	1.1e-05	1.2e-05		1.1e-05	1.2e-05	1.2e-05	1.4e-05
I4FE4SR	2.2e-08	4.7e-08	1.9e-08	4.2e-08	3.4e-08	2.9e-08	3.2e-08		3e-08	3.3e-08	3.4e-08	4e-08
ICDHyr	0.00045	0.00086	0.0004	0.00078	0.00045	0.00053	0.00062		0.00019	0.00064	0.00065	0.00075
ICYSDS	1.5e-07	3.3e-07	1.3e-07	2.9e-07	2.4e-07	2e-07	2.2e-07		2.1e-07	2.3e-07	2.4e-07	2.8e-07
IGPDH	7.9e-06	1.7e-05	6.8e-06	1.5e-05	1.2e-05	1.1e-05	1.2e-05		1.1e-05	1.2e-05	1.2e-05	1.4e-05
IGPS	4.7e-06	1e-05	4.1e-06	9.2e-06	7.4e-06	6.3e-06	6.9e-06		6.6e-06	7.3e-06	7.4e-06	8.7e-06
ILETA_reverse	2.4e-05	5.2e-05	2.1e-05	4.7e-05	3.8e-05	3.2e-05	3.6e-05		3.4e-05	3.7e-05	3.8e-05	4.4e-05
IMPC_reverse	4.5e-05	9.8e-05	3.9e-05	8.7e-05	7.1e-05	6e-05	6.6e-05		6.3e-05	6.9e-05	7.1e-05	8.3e-05
IMPD	2e-05	4.4e-05	1.8e-05	3.9e-05	3.2e-05	2.7e-05	3e-05		2.8e-05	3.1e-05	3.2e-05	3.7e-05
IPDPS	1.8e-07	3.8e-07	1.5e-07	3.4e-07	2.8e-07	2.3e-07	2.6e-07		2.5e-07	2.7e-07	2.8e-07	3.2e-07
IPMD	3.8e-05	8.1e-05	3.3e-05	7.3e-05	5.9e-05	5e-05	5.5e-05		5.3e-05	5.8e-05	5.9e-05	6.9e-05
IPPS	3.8e-05	8.1e-05	3.3e-05	7.3e-05	5.9e-05	5e-05	5.5e-05		5.3e-05	5.8e-05	5.9e-05	6.9e-05
K2L4Aabcpp	1.6e-06	3.5e-06	1.4e-06	3.1e-06	2.5e-06	2.2e-06	2.4e-06		2.3e-06	2.5e-06	2.5e-06	3e-06
KARA1_reverse	7.3e-05	0.00016	6.3e-05	0.00014	0.00011	9.7e-05	0.00011		0.0001	0.00011	0.00011	0.00013
KARA2	2.4e-05	5.2e-05	2.1e-05	4.7e-05	3.8e-05	3.2e-05	3.6e-05		3.4e-05	3.7e-05	3.8e-05	4.4e-05
KDOCT2	3.2e-06	7e-06	2.8e-06	6.3e-06	5.1e-06	4.3e-06	4.8e-06		4.5e-06	5e-06	5.1e-06	5.9e-06
KDOPP	3.2e-06	7e-06	2.8e-06	6.3e-06	5.1e-06	4.3e-06	4.8e-06		4.5e-06	5e-06	5.1e-06	5.9e-06
KDOPS	3.2e-06	7e-06	2.8e-06	6.3e-06	5.1e-06	4.3e-06	4.8e-06		4.5e-06	5e-06	5.1e-06	5.9e-06
LPADSS	1.6e-06	3.5e-06	1.4e-06	3.1e-06	2.5e-06	2.2e-06	2.4e-06		2.3e-06	2.5e-06	2.5e-06	3e-06
MDH	0.00044	0.00086	0.0004	0.00078	0.00045	0.0011	0.00098		0.00053	0.00063	0.00065	0.00074
MECDPS	2e-07	4.3e-07	1.7e-07	3.8e-07	3.1e-07	2.7e-07	2.9e-07		2.8e-07	3.1e-07	3.1e-07	3.6e-07
MEPCT	2e-07	4.3e-07	1.7e-07	3.8e-07	3.1e-07	2.7e-07	2.9e-07		2.8e-07	3.1e-07	3.1e-07	3.6e-07
METAT	7.5e-08	1.6e-07	6.5e-08	1.4e-07	1.2e-07	1e-07	1.1e-07		1e-07	1.1e-07	1.2e-07	1.4e-07
METS	1.3e-05	2.8e-05	1.1e-05	2.5e-05	2e-05	1.7e-05	1.9e-05		1.8e-05	2e-05	2e-05	2.4e-05
MOAT	1.6e-06	3.5e-06	1.4e-06	3.1e-06	2.5e-06	2.2e-06	2.4e-06		2.3e-06	2.5e-06	2.5e-06	3e-06
MOAT2	1.6e-06	3.5e-06	1.4e-06	3.1e-06	2.5e-06	2.2e-06	2.4e-06		2.3e-06	2.5e-06	2.5e-06	3e-06
MOCOS	1e-08	2.2e-08	8.8e-09	2e-08	1.6e-08	1.4e-08	1.5e-08		1.4e-08	1.6e-08	1.6e-08	1.9e-08
MOHMT	4.8e-08	1e-07	4.2e-08	9.3e-08	7.5e-08	6.4e-08	7e-08		6.7e-08	7.4e-08	7.5e-08	8.8e-08
MPTAT	2e-08	4.4e-08	1.8e-08	3.9e-08	3.2e-08	2.7e-08	3e-08		2.8e-08	3.1e-08	3.2e-08	3.7e-08
MPTSS	4.1e-08	8.8e-08	3.5e-08	7.9e-08	6.4e-08	5.4e-08	6e-08		5.7e-08	6.2e-08	6.4e-08	7.5e-08
MTHFC	8.2e-05	0.00018	7.1e-05	0.00016	0.00013	0.00011	0.00012		0.00012	0.00013	0.00013	0.00015
MTHFD	8.2e-05	0.00018	7.1e-05	0.00016	0.00013	0.00011	0.00012		0.00012	0.00013	0.00013	0.00015
MTHFR2	1.3e-05	2.8e-05	1.1e-05	2.5e-05	2e-05	1.7e-05	1.9e-05		1.8e-05	2e-05	2e-05	2.4e-05
NADK	3.7e-08	8.1e-08	3.2e-08	7.2e-08	5.8e-08	5e-08	5.5e-08		5.2e-08	5.7e-08	5.8e-08	6.8e-08
NADS1	1.9e-07	4.1e-07	1.6e-07	3.7e-07	3e-07	2.5e-07	2.8e-07		2.7e-07	2.9e-07	3e-07	3.5e-07
NI2tpp	2.7e-08	5.8e-08	2.3e-08	5.2e-08	4.2e-08	3.6e-08	3.9e-08		3.8e-08	4.1e-08	4.2e-08	4.9e-08
NNATr	1.9e-07	4.1e-07	1.6e-07	3.7e-07	3e-07	2.5e-07	2.8e-07		2.7e-07	2.9e-07	3e-07	3.5e-07
NNDPR	1.9e-07	4.1e-07	1.6e-07	3.7e-07	3e-07	2.5e-07	2.8e-07		2.7e-07	2.9e-07	3e-07	3.5e-07
OCTDPS	1.9e-08	4e-08	1.6e-08	3.6e-08	2.9e-08	2.5e-08	2.7e-08		2.6e-08	2.8e-08	2.9e-08	3.4e-08
OGMEACPD	1.7e-10	3.6e-10	1.4e-10	3.2e-10	2.6e-10	2.2e-10	2.4e-10		2.3e-10	2.6e-10	2.6e-10	3.1e-10
OGMEACPR	1.7e-10	3.6e-10	1.4e-10	3.2e-10	2.6e-10	2.2e-10	2.4e-10		2.3e-10	2.6e-10	2.6e-10	3.1e-10
OGMEACPS	1.7e-10	3.6e-10	1.4e-10	3.2e-10	2.6e-10	2.2e-10	2.4e-10		2.3e-10	2.6e-10	2.6e-10	3.1e-10
OHPBAT	1.9e-08	4e-08	1.6e-08	3.6e-08	2.9e-08	2.5e-08	2.7e-08		2.6e-08	2.8e-08	2.9e-08	3.4e-08
OMPDC	2.8e-05	6e-05	2.4e-05	5.3e-05	4.3e-05	3.7e-05	4e-05		3.9e-05	4.2e-05	4.3e-05	5.1e-05
OPHHX	1.9e-08	4e-08	1.6e-08	3.6e-08	2.9e-08	2.5e-08	2.7e-08		2.6e-08	2.8e-08	2.9e-08	3.4e-08
OPMEACPD	1.7e-10	3.6e-10	1.4e-10	3.2e-10	2.6e-10	2.2e-10	2.4e-10		2.3e-10	2.6e-10	2.6e-10	3.1e-10
OPMEACPR	1.7e-10	3.6e-10	1.4e-10	3.2e-10	2.6e-10	2.2e-10	2.4e-10		2.3e-10	2.6e-10	2.6e-10	3.1e-10
OPMEACPS	1.7e-10	3.6e-10	1.4e-10	3.2e-10	2.6e-10	2.2e-10	2.4e-10		2.3e-10	2.6e-10	2.6e-10	3.1e-10
P5CR	1.8e-05	4e-05	1.6e-05	3.6e-05	2.9e-05	2.5e-05	2.7e-05		2.6e-05	2.8e-05	2.9e-05	3.4e-05
PANTS	4.8e-08	1e-07	4.2e-08	9.3e-08	7.5e-08	6.4e-08	7e-08		6.7e-08	7.4e-08	7.5e-08	8.8e-08
PAPPT3	2.3e-06	5e-06	2e-06	4.5e-06	3.6e-06	3.1e-06	3.4e-06		3.2e-06	3.6e-06	3.6e-06	4.2e-06
PDX5POi		4e-08		3.6e-08	2.9e-08	2.5e-08	2.7e-08		2.6e-08	2.8e-08	2.9e-08	3.4e-08
PE160abcpp	3.8e-06	8.3e-06	3.3e-06	7.4e-06	6e-06	5.1e-06	5.6e-06		5.4e-06	5.9e-06	6e-06	7e-06
PE161abcpp	1.8e-06	3.8e-06	1.5e-06	3.4e-06	2.7e-06	2.3e-06	2.6e-06		2.5e-06	2.7e-06	2.7e-06	3.2e-06
PERD	1.9e-08	4e-08	1.6e-08	3.6e-08	2.9e-08	2.5e-08	2.7e-08		2.6e-08	2.8e-08	2.9e-08	3.4e-08
PFK	0.00049		0.00043	0.00094		0.00037	0.0004		0.0004	0.00075	0.00077	0.00089
PFK_3	9.3e-05	0.00022	7.9e-05	0.00019		0.00013	0.0001		7.2e-05	0.00015	0.00015	0.00018
PGAMT_reverse	7.9e-06	1.7e-05	6.8e-06	1.5e-05	1.2e-05	1e-05	1.2e-05		1.1e-05	1.2e-05	1.2e-05	1.4e-05
PGCD	0.00014	0.00031	0.00012	0.00028	0.00022	0.00019	0.00021		0.0002	0.00022	0.00022	0.00026
PGI	0.00056		0.00049	0.001		0.00029	0.00058		0.0007	0.00081		0.00096
PGK_reverse	0.0015	0.0031	0.0013	0.0027	0.002	0.0011	0.0015		0.0016	0.0022	0.0022	0.0026
PGL	0.00033	0.00076	0.00028	0.00068	0.00017	0.00047	0.00038		0.00029	0.00053	0.00054	0.00064
PMEACPE	1.7e-10	3.6e-10	1.4e-10	3.2e-10	2.6e-10	2.2e-10	2.4e-10		2.3e-10	2.6e-10	2.6e-10	3.1e-10
PMPK	1.9e-08	4e-08	1.6e-08	3.6e-08	2.9e-08	2.5e-08	2.7e-08		2.6e-08	2.8e-08	2.9e-08	3.4e-08
PNTK	4.8e-08	1e-07	4.2e-08	9.3e-08	7.5e-08	6.4e-08	7e-08		6.7e-08	7.4e-08	7.5e-08	8.8e-08
PPBNGS	1.5e-07	3.2e-07	1.3e-07	2.9e-07	2.3e-07	2e-07	2.2e-07		2.1e-07	2.3e-07	2.3e-07	2.7e-07
PPC	0.00025	0.00053	0.00021	0.00048	0.00039	4.8e-05				0.00038	0.00039	0.00045
PPCDC	4.8e-08	1e-07	4.2e-08	9.3e-08	7.5e-08	6.4e-08	7e-08		6.7e-08	7.4e-08	7.5e-08	8.8e-08
PPNCL2	4.8e-08	1e-07	4.2e-08	9.3e-08	7.5e-08	6.4e-08	7e-08		6.7e-08	7.4e-08	7.5e-08	8.8e-08
PPND	1.2e-05	2.5e-05	1e-05	2.2e-05	1.8e-05	1.5e-05	1.7e-05		1.6e-05	1.8e-05	1.8e-05	2.1e-05
PPNDH	1.5e-05	3.3e-05	1.3e-05	3e-05	2.4e-05	2.1e-05	2.3e-05		2.2e-05	2.4e-05	2.4e-05	2.8e-05
PPPGO3	1.9e-08	4e-08	1.6e-08	3.6e-08	2.9e-08	2.5e-08	2.7e-08		2.6e-08	2.8e-08	2.9e-08	3.4e-08
PRAGSr	3.7e-05	8.1e-05	3.2e-05	7.2e-05	5.9e-05	5e-05	5.5e-05		5.2e-05	5.7e-05	5.9e-05	6.8e-05
PRAIi	4.7e-06	1e-05	4.1e-06	9.2e-06	7.4e-06	6.3e-06	6.9e-06		6.6e-06	7.3e-06	7.4e-06	8.7e-06
PRAIS	3.7e-05	8.1e-05	3.2e-05	7.2e-05	5.9e-05	5e-05	5.5e-05		5.2e-05	5.7e-05	5.9e-05	6.8e-05
PRAMPC	7.9e-06	1.7e-05	6.8e-06	1.5e-05	1.2e-05	1.1e-05	1.2e-05		1.1e-05	1.2e-05	1.2e-05	1.4e-05
PRASCSi	3.7e-05	8.1e-05	3.2e-05	7.2e-05	5.8e-05	5e-05	5.5e-05		5.2e-05	5.7e-05	5.8e-05	6.8e-05
PRATPP	7.9e-06	1.7e-05	6.8e-06	1.5e-05	1.2e-05	1.1e-05	1.2e-05		1.1e-05	1.2e-05	1.2e-05	1.4e-05
PRFGS	3.7e-05	8.1e-05	3.2e-05	7.2e-05	5.9e-05	5e-05	5.5e-05		5.2e-05	5.7e-05	5.9e-05	6.8e-05
PRMICI	7.9e-06	1.7e-05	6.8e-06	1.5e-05	1.2e-05	1.1e-05	1.2e-05		1.1e-05	1.2e-05	1.2e-05	1.4e-05
PRPPS	7.8e-05	0.00017	6.7e-05	0.00015	0.00012	0.0001	0.00011		0.00011	0.00012	0.00012	0.00014
PSCVT	3.2e-05	6.9e-05	2.8e-05	6.1e-05	5e-05	4.2e-05	4.7e-05		4.4e-05	4.9e-05	5e-05	5.8e-05
PSD160	5.3e-06	1.2e-05	4.6e-06	1e-05	8.3e-06	7.1e-06	7.8e-06		7.4e-06	8.2e-06	8.3e-06	9.7e-06
PSD161	6.3e-06	1.4e-05	5.4e-06	1.2e-05	9.8e-06	8.4e-06	9.2e-06		8.8e-06	9.6e-06	9.8e-06	1.1e-05
PSERT	0.00014	0.00031	0.00012	0.00028	0.00022	0.00019	0.00021		0.0002	0.00022	0.00022	0.00026
PSP_L	0.00014	0.00031	0.00012	0.00028	0.00022	0.00019	0.00021		0.0002	0.00022	0.00022	0.00026
PSSA160	5.3e-06	1.2e-05	4.6e-06	1e-05	8.3e-06	7.1e-06	7.8e-06		7.4e-06	8.2e-06	8.3e-06	9.7e-06
PSSA161	6.3e-06	1.4e-05	5.4e-06	1.2e-05	9.8e-06	8.4e-06	9.2e-06		8.8e-06	9.6e-06	9.8e-06	1.1e-05
PTPATi	4.8e-08	1e-07	4.2e-08	9.3e-08	7.5e-08	6.4e-08	7e-08		6.7e-08	7.4e-08	7.5e-08	8.8e-08
PUNP1_reverse	5.6e-08	1.2e-07	4.9e-08	1.1e-07	8.8e-08	7.5e-08	8.2e-08		7.9e-08	8.6e-08	8.8e-08	1e-07
QULNS	1.9e-07	4.1e-07	1.6e-07	3.7e-07	3e-07	2.5e-07	2.8e-07		2.7e-07	2.9e-07	3e-07	3.5e-07
RBFK	1.9e-08	4e-08	1.6e-08	3.6e-08	2.9e-08	2.5e-08	2.7e-08		2.6e-08	2.8e-08	2.9e-08	3.4e-08
RBFSa	7.4e-08	1.6e-07	6.4e-08	1.4e-07	1.2e-07	9.9e-08	1.1e-07		1e-07	1.1e-07	1.2e-07	1.4e-07
RBFSb	3.7e-08	8.1e-08	3.2e-08	7.2e-08	5.8e-08	5e-08	5.5e-08		5.2e-08	5.7e-08	5.8e-08	6.8e-08
RHCCE	3.7e-08	8.1e-08	3.2e-08	7.2e-08	5.8e-08	5e-08	5.5e-08		5.2e-08	5.7e-08	5.8e-08	6.8e-08
SDPDS	3.1e-05	6.7e-05	2.7e-05	6e-05	4.8e-05	4.1e-05	4.5e-05		4.3e-05	4.7e-05	4.8e-05	5.7e-05
SDPTA_reverse	3.1e-05	6.7e-05	2.7e-05	6e-05	4.8e-05	4.1e-05	4.5e-05		4.3e-05	4.7e-05	4.8e-05	5.7e-05
SERAT	2.1e-05	4.5e-05	1.8e-05	4e-05	3.2e-05	2.8e-05	3e-05		2.9e-05	3.2e-05	3.2e-05	3.8e-05
SHCHD2	1.9e-08	4e-08	1.6e-08	3.6e-08	2.9e-08	2.5e-08	2.7e-08		2.6e-08	2.8e-08	2.9e-08	3.4e-08
SHCHF	1.9e-08	4e-08	1.6e-08	3.6e-08	2.9e-08	2.5e-08	2.7e-08		2.6e-08	2.8e-08	2.9e-08	3.4e-08
SHSL1	1.3e-05	2.8e-05	1.1e-05	2.5e-05	2e-05	1.7e-05	1.9e-05		1.8e-05	2e-05	2e-05	2.4e-05
THDPS	3.1e-05	6.7e-05	2.7e-05	6e-05	4.8e-05	4.1e-05	4.5e-05		4.3e-05	4.7e-05	4.8e-05	5.7e-05
THRS	4.5e-05	9.8e-05	3.9e-05	8.8e-05	7.1e-05	6e-05	6.7e-05		6.3e-05	7e-05	7.1e-05	8.3e-05
TMDS	2.2e-06	4.7e-06	1.9e-06	4.2e-06	3.4e-06	2.9e-06	3.2e-06		3.1e-06	3.3e-06	3.4e-06	4e-06
TMPK	1.9e-08	4e-08	1.6e-08	3.6e-08	2.9e-08	2.5e-08	2.7e-08		2.6e-08	2.8e-08	2.9e-08	3.4e-08
TMPPP	1.9e-08	4e-08	1.6e-08	3.6e-08	2.9e-08	2.5e-08	2.7e-08		2.6e-08	2.8e-08	2.9e-08	3.4e-08
TPI	0.00069	0.0014	0.00061	0.0013	0.0021	0.00049	0.00072		0.00078	0.001	0.0011	0.0012
TRPAS2_reverse	4.7e-06	1e-05	4.1e-06	9.2e-06	7.4e-06	6.3e-06	6.9e-06		6.6e-06	7.3e-06	7.4e-06	8.7e-06
TYRL	1.9e-08	4e-08	1.6e-08	3.6e-08	2.9e-08	2.5e-08	2.7e-08		2.6e-08	2.8e-08	2.9e-08	3.4e-08
U23GAAT	3.2e-06	7e-06	2.8e-06	6.3e-06	5.1e-06	4.3e-06	4.8e-06		4.5e-06	5e-06	5.1e-06	5.9e-06
UAAGDS	2.3e-06	5e-06	2e-06	4.5e-06	3.6e-06	3.1e-06	3.4e-06		3.2e-06	3.6e-06	3.6e-06	4.2e-06
UAGCVT	2.3e-06	5e-06	2e-06	4.5e-06	3.6e-06	3.1e-06	3.4e-06		3.2e-06	3.6e-06	3.6e-06	4.2e-06
UAGDP	7.9e-06	1.7e-05	6.8e-06	1.5e-05	1.2e-05	1e-05	1.2e-05		1.1e-05	1.2e-05	1.2e-05	1.4e-05
UAGPT3	2.3e-06	5e-06	2e-06	4.5e-06	3.6e-06	3.1e-06	3.4e-06		3.2e-06	3.6e-06	3.6e-06	4.2e-06
UAMAGS	2.3e-06	5e-06	2e-06	4.5e-06	3.6e-06	3.1e-06	3.4e-06		3.2e-06	3.6e-06	3.6e-06	4.2e-06
UAMAS	2.3e-06	5e-06	2e-06	4.5e-06	3.6e-06	3.1e-06	3.4e-06		3.2e-06	3.6e-06	3.6e-06	4.2e-06
UAPGR	2.3e-06	5e-06	2e-06	4.5e-06	3.6e-06	3.1e-06	3.4e-06		3.2e-06	3.6e-06	3.6e-06	4.2e-06
UDCPDPS	4.6e-09	9.9e-09	4e-09	8.9e-09	7.2e-09	6.1e-09	6.7e-09		6.4e-09	7e-09	7.2e-09	8.4e-09
UGMDDS	2.3e-06	5e-06	2e-06	4.5e-06	3.6e-06	3.1e-06	3.4e-06		3.2e-06	3.6e-06	3.6e-06	4.2e-06
UHGADA	3.2e-06	7e-06	2.8e-06	6.3e-06	5.1e-06	4.3e-06	4.8e-06		4.5e-06	5e-06	5.1e-06	5.9e-06
UPP3S	3.7e-08	8.1e-08	3.2e-08	7.2e-08	5.8e-08	5e-08	5.5e-08		5.2e-08	5.7e-08	5.8e-08	6.8e-08
UPPDC1	1.9e-08	4e-08	1.6e-08	3.6e-08	2.9e-08	2.5e-08	2.7e-08		2.6e-08	2.8e-08	2.9e-08	3.4e-08
VALTA_reverse	3.5e-05	7.6e-05	3.1e-05	6.8e-05	5.5e-05	4.7e-05	5.2e-05		4.9e-05	5.4e-05	5.5e-05	6.5e-05

## Sheet: metabolite_concentration_umol_p
*missing proteomics data - not used
metabolite	KEGG_ID	acetate	fructose	galactose	glucose	glycerol	pyruvate	succinate		gluconate*
ATP	C00002	5.163 ¬± 0.212	7.456 ¬± 0.626	4.089 ¬± 0.074	7.933 ¬± 0.155	4.767 ¬± 0.234	5.776 ¬± 0.174	7.723 ¬± 0.141		4.641 ¬± 0.08
ADP	C00008	0.89 ¬± 0.021	1.381 ¬± 0.129	0.787 ¬± 0.018	1.391 ¬± 0.017	0.846 ¬± 0.006	0.988 ¬± 0.043	1.345 ¬± 0.043		0.848 ¬± 0.038
AMP	C00020	0.718 ¬± 0.056	1.102 ¬± 0.101	0.566 ¬± 0.019	1.109 ¬± 0.057	0.693 ¬± 0.013	0.772 ¬± 0.014	1.086 ¬± 0.046		0.67 ¬± 0.008
NADH	C00004	0.05 ¬± 0.038	1.05 ¬± 0.743	0.29 ¬± 0.093	0.063 ¬± 0.003	0.163 ¬± 0.028	0.202 ¬± 0.171	0.083 ¬± 0.019		0.06 ¬± 0.004
NAD	C00003	7.324 ¬± 0.166	3.88 ¬± 0.371	5.15 ¬± 0.331	4.859 ¬± 0.283	4.396 ¬± 0.264	6.751 ¬± 0.187	7.166 ¬± 0.462		4.209 ¬± 0.116
NADPH	C00005	0.167 ¬± 0.057	0.201 ¬± 0.024	0.138 ¬± 0.031	0.262 ¬± 0.021	0.168 ¬± 0.008	0.133 ¬± 0.008	0.183 ¬± 0.019		0.237 ¬± 0.043
NADP	C00006	0.026 ¬± 0.002	0.019 ¬± 0.001	0.017 ¬± 0.001	0.026 ¬± 0.001	0.02 ¬± 0.001	0.018 ¬± 0.001	0.026 ¬± 0.001		0.015 ¬± 0.001
F6P	C00085	0.471 ¬± 0.049	0.567 ¬± 0.041	0.287 ¬± 0.019	0.773 ¬± 0.067	0.48 ¬± 0.075	0.663 ¬± 0.082	1.307 ¬± 0.077		0.577 ¬± 0.035
MAL	C00149	3.864 ¬± 0.288	3.942 ¬± 0.308	1.588 ¬± 0.058	3.876 ¬± 0.168	2.117 ¬± 0.164	2.362 ¬± 0.089	24.89 ¬± 1.232		2.819 ¬± 0.096
PEP	C00074	0.563 ¬± 0.062	0.966 ¬± 0.144	0.405 ¬± 0.035	0.812 ¬± 0.182	0.718 ¬± 0.219	0.397 ¬± 0.032	1.902 ¬± 0.154		0.695 ¬± 0.124
ICIT	C00311	0.095 ¬± 0.005	0.015 ¬± 0.003	0.037 ¬± 0.002	0.019 ¬± 0.005	0.019 ¬± 0.004	0.562 ¬± 0.055	0.033 ¬± 0.003		0.017 ¬± 0.002
G6P	C00092	0.894 ¬± 0.025	1.369 ¬± 0.131	7.306 ¬± 0.191	2.183 ¬± 0.041	0.615 ¬± 0.088	1.289 ¬± 0.072	3.086 ¬± 0.063		1.237 ¬± 0.224
SUCC	C00042	2.154 ¬± 0.513	2.075 ¬± 0.237	2.383 ¬± 1.467	2.726 ¬± 0.445	1.414 ¬± 0.122	1.857 ¬± 1.187	NaN		1.791 ¬± 0.192
PYR	C00022	6.935 ¬± 1.328	1.719 ¬± 0.23	7.244 ¬± 3.767	3.232 ¬± 0.8	4.648 ¬± 2.114	NaN	8.253 ¬± 5.686		1.565 ¬± 0.569
6PGC	C00345	0.251 ¬± 0.011	0.108 ¬± 0.015	1.054 ¬± 0.052	0.641 ¬± 0.104	0.064 ¬± 0.031	0.544 ¬± 0.061	0.231 ¬± 0.057		2.134 ¬± 0.107
AKG	C00026	0.58 ¬± 0.095	1.113 ¬± 0.08	0.196 ¬± 0.04	1.465 ¬± 0.214	0.952 ¬± 0.098	0.854 ¬± 0.236	2.151 ¬± 0.167		1.013 ¬± 0.397
